# Supplementary material for: Inhibition of miR-25 Ameliorates Cardiac Dysfunction and Fibrosis by Restoring Krüppel-like Factor 4 Expression
Source: MDPI journal article supplement (doi:10.3390/ijms241512434), 2023-08-04
Supplement: s1 [file s1]

# The inhibition of miR-25 Ameliorates Cardiac Dysfunction and Fibrosis by Restoring Krüppel-like Factor 4 Expression

## Supplementary Tables

**Table S1. Echocardiographic parameter at 4 weeks tail vein injection with AAV9 EGFP and AAV9 miR-25 TuD**

|           | sham (n=4 )  | AAV9-EGFP<br>+Ang II (n=3) | AAV9-miR-25 TuD<br>+Ang II (n=4) |
|-----------|--------------|----------------------------|----------------------------------|
| IVSd(mm)  | 0.96±0.02    | 1.20±0.07††                | 1.10±0.01                        |
| LVIDd(mm) | 4.52±0.09    | 4.74±0.10                  | 4.62±0.09                        |
| LVPWd(mm) | 0.98±0.01    | 1.12±0.05†                 | 1.05±0.03                        |
| IVSs(mm)  | 1.60±0.04    | 1.81±0.09                  | 1.82±0.06                        |
| LVIDs(mm) | 3.13±0.11    | 3.66±0.13†                 | 3.33±0.03                        |
| LVPWs(mm) | 1.47±0.18    | 1.38±0.06                  | 1.41±0.06                        |
| EF(%)     | 65.19±1.40   | 52.44±2.11††               | 60.83±1.37*                      |
| FS(%)     | 30.85±0.96   | 22.97±1.19††               | 27.98±0.89*                      |
| HR (BPM)  | 448.97±16.15 | 438.83±14.36               | 463.51±29.87                     |

IVSD = interventricular septum, diastole (mm), LV = left ventricle, LVIDd = LV internal dimension, diastole (mm), LVPWd = LV posterior wall, diastole (mm), IVSs = interventricular septum, systole (mm), LVIDs = LV internal dimension, systole (mm), LVPWs = LV posterior wall, systole (mm), EF = ejection fraction (%), FS = fractional shortening (%), HR = heart rate (BPM), All data represent the mean±S.E.M of cardiac functional parameters. Statistical significance was determined by one-way ANOVA analysis of variance followed by the post hoc Tukey's multiple comparison test.

†p<0.05, ††p<0.01 vs sham

\*p<0.05 vs AAV9-EGFP+Ang II

**Table S2. Quantitative RT-PCR primer information**

| Gene         |   | Sequence (5' to 3')                                                                             |
|--------------|---|-------------------------------------------------------------------------------------------------|
| miR-25-3p    | F | 5'-CAT TGC ACT TGT CTC GGT CTG A- 3'                                                            |
|              | R | 5'-CTC ACA GGA CAG CTG AAC ACC- 3'                                                              |
| pri-miR-25   | F | 5'-CTC ACA GGA CAG CTG AAC ACC- 3'                                                              |
|              | R | 5'-CCC CCA CAT CTG CAG TGT TG- 3'                                                               |
| pre-miR-25   | F | 5'-CAG TGT TGA GAG GCG GAG ACT- 3'                                                              |
|              | R | 5'-GCA CTG TCA GAC CGA GAC AAG- 3'                                                              |
| $\beta$ -MHC | F | 5'-CCC AAG GAA AAG AAG CAC GTC- 3'                                                              |
|              | R | 5'-AGG TCA GCT GGA TAG CGA CAT C- 3'                                                            |
| ANF          | F | 5'-CGA GCA GCG GAT TGA ACT GT- 3'                                                               |
|              | R | 5'-TTG TGG TGA AGC CAC TCC TG- 3'                                                               |
| BNP          | F | 5'-CTC CTA CTA CGA GCT GAA CCA G- 3'                                                            |
|              | R | 5'-CCA GAA AGC TCA AAC TTG ACA GGC- 3'                                                          |
| IL-18        | F | 5'-GAC AAA AGA AAC CCG CCT G- 3'                                                                |
|              | R | 5'-ACA TCC TTC CAT CCT TCA CAG- 3'                                                              |
| IL-1 $\beta$ | F | 5'-TCC AGG ATG AGG ACA TGA TGA GCA- 3'                                                          |
|              | R | 5'-GAA CGT CAC ACA CAC CAG CAG GTT A- 3'                                                        |
| IL-6         | F | 5'-CAA AGC CAG AGT CCT TCA GAG- 3'                                                              |
|              | R | 5'-GTC CTT AGC CAC TCC TTC TG- 3'                                                               |
| RANTES       | F | 5'-TGC AGA GGA CTC TGA GAC AGC- 3'                                                              |
|              | R | 5'-GAG TGG TGT CCG AGC CAT A- 3'                                                                |
| 18s          | F | 5'-TAA CGA ACG AGA CTC TGG CAT-3'                                                               |
|              | R | 5'-CGG ACA TCT AAG GGC ATC ACAG-3'                                                              |
| U6           |   | not available, Mir-X miRNA First-Strand Synthesis Kit components (Takara Bio Inc, Shiga, Japan) |
